# Supplementary material for: Laboratory Experiments on the In Situ Upgrading of Heavy Crude Oil Using Catalytic Aquathermolysis by Acidic Ionic Liquid
Source: MDPI journal article supplement (doi:10.3390/ma15175959), 2022-08-29
Supplement: s1 [file s1]

**Table S1** viscosity reduction percentage and sulfur content of each run of the catalytic aquathermolysis process

| Item | Temperature,<br>(°C) | Catalyst,<br>(Wt %) | Water concentration,<br>(v/v %) | Time,<br>(hrs) | Viscosity Reduction, % |       |       | Sulfur Content, ppm |       |       |
|------|----------------------|---------------------|---------------------------------|----------------|------------------------|-------|-------|---------------------|-------|-------|
|      |                      |                     |                                 |                | IL-4                   | IL-10 | IL-16 | IL-4                | IL-10 | IL-16 |
| 1    | 125                  | 0.03                | 20                              | 12             | 35                     | 45    | 49    | 23155               | 22150 | 22810 |
| 2    | 125                  | 0.09                | 50                              | 24             | 46                     | 57    | 61    | 20950               | 20585 | 20940 |
| 3    | 125                  | 0.06                | 40                              | 48             | 51                     | 66    | 71    | 19590               | 17980 | 19850 |
| 4    | 125                  | 0.12                | 30                              | 36             | 52                     | 63    | 68    | 19250               | 17540 | 18450 |
| 5    | 150                  | 0.03                | 30                              | 24             | 44.1                   | 55.3  | 58    | 22975               | 20285 | 20350 |
| 6    | 150                  | 0.12                | 20                              | 48             | 59                     | 64.7  | 62.5  | 20530               | 19225 | 18975 |
| 7    | 150                  | 0.09                | 40                              | 12             | 45                     | 57    | 61    | 21350               | 19865 | 18950 |
| 8    | 150                  | 0.06                | 50                              | 36             | 43                     | 61.2  | 72    | 20760               | 17845 | 18498 |
| 9    | 175                  | 0.12                | 50                              | 12             | 65.8                   | 75    | 78    | 18280               | 16580 | 17345 |
| 10   | 175                  | 0.09                | 30                              | 36             | 89                     | 94    | 93.5  | 17530               | 14590 | 16255 |
| 11   | 175                  | 0.06                | 20                              | 24             | 63                     | 71    | 73    | 19850               | 17535 | 17250 |
| 12   | 175                  | 0.03                | 40                              | 48             | 62                     | 69.6  | 68    | 19540               | 18525 | 17850 |
| 13   | 200                  | 0.09                | 20                              | 36             | 89.8                   | 94.3  | 93.7  | 16950               | 15120 | 15560 |
| 14   | 200                  | 0.03                | 50                              | 48             | 68                     | 72    | 66    | 18920               | 18455 | 18450 |
| 15   | 200                  | 0.06                | 30                              | 12             | 63                     | 82    | 76    | 17890               | 16940 | 16250 |
| 16   | 200                  | 0.12                | 40                              | 24             | 72                     | 83    | 61    | 17155               | 18230 | 18950 |
